# Supplementary material
Source: publisher figshare collection journal article supplement (https://karger.figshare.com/articles/dataset/_/8983766)
Supplement: Supplementary file 1 [file 1]

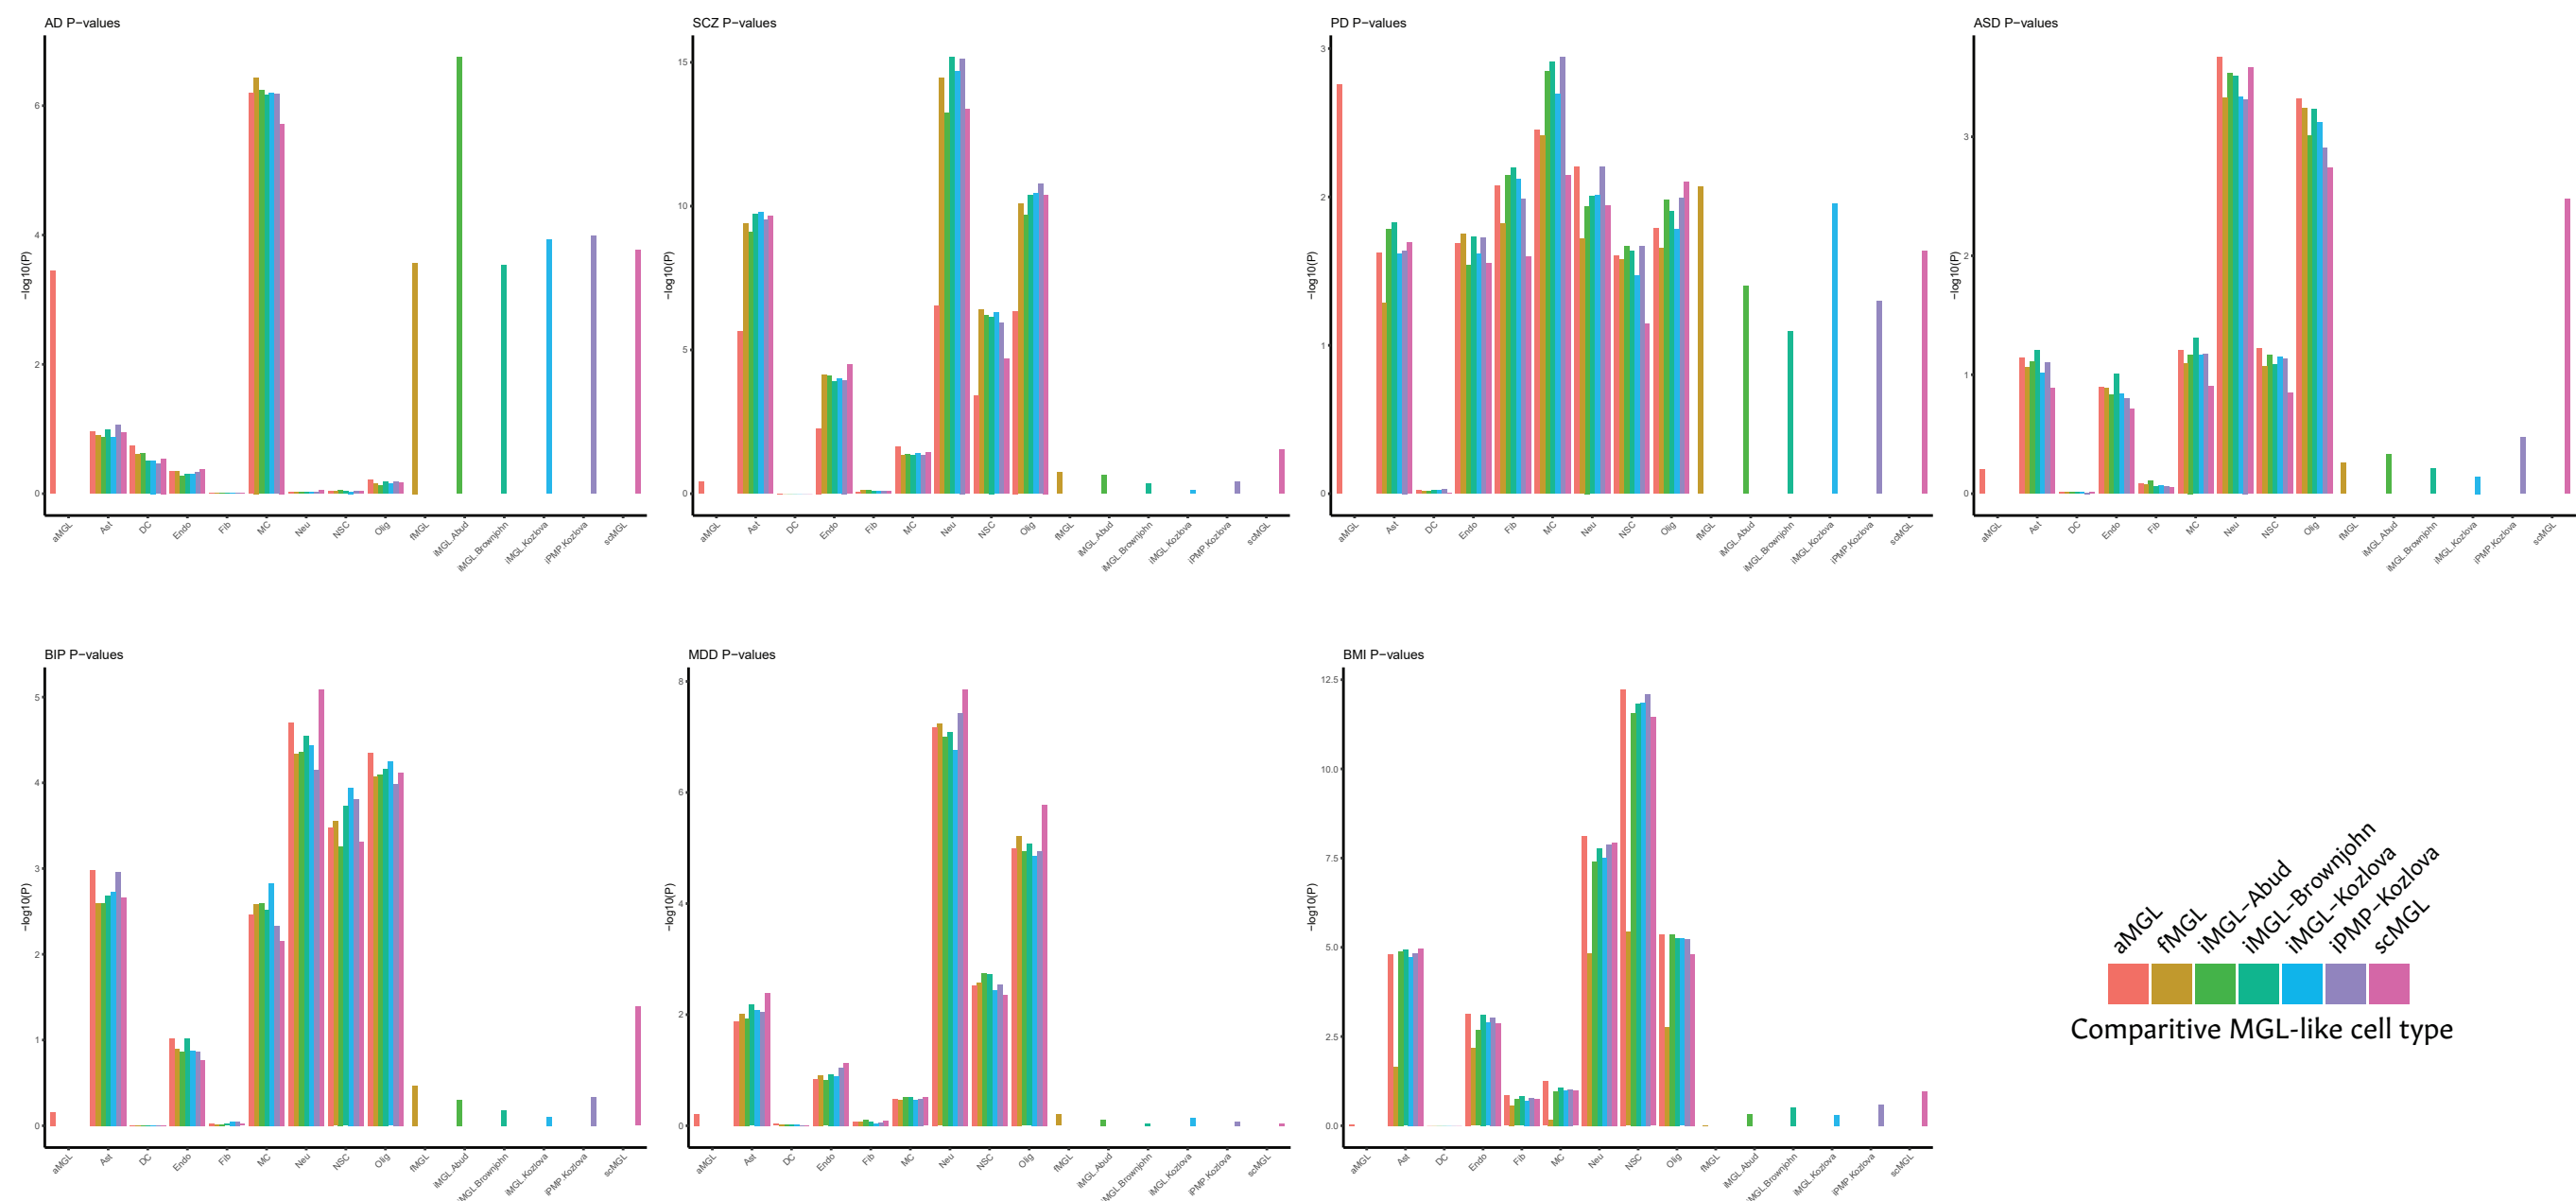

**Supplementary Figure 3. Extended MAGMA GWAS enrichment for various traits.** Multiple MAGMA cell type specific enrichment runs for each GWAS trait: Alzheimer’s disease (AD; Jansen et al., 2019), Schizophrenia (SZ; PGC SCZ2, 2014), Parkinson’s disease (PD; Nalls et al., 2019), autism spectrum disorder (ASD; Grove et al., 2019), bipolar disorder (BIP; Stahl et al., 2018), major depressive disorder (MDD; Wray et al., 2018), and body mass index (BMI; Yengo et al., 2018) across multiple cell types. Each color represents a 9-cell type specificity matrix and MAGMA enrichment generated using a single MGL or MGL-like cell type against the eight unrelated cell types. For a given cell type on the x-axis, all of its bar colors depict the variability of its enrichment against the different MGL-like sets, showing a strong agreement of enrichment irrespective of MGL-like cell type used for comparison. aMGL – adult microglia, Ast – astrocytes, DC – dendritic cell, Endo – neural endothelial cells. fMGL – fetal microglia, iPMP – hi-PSC derived primitive macrophage precursor, Fib – fibroblast, MC – monocyte, Neu – neurons, NPC – neural progenitor cell, Olig – oligodendrocytes, scMGL – single-cell microglia.
