# Supplementary material
Source: publisher figshare collection journal article supplement (https://karger.figshare.com/articles/dataset/_/8983766)
Supplement: Supplementary file 2 [file 1]

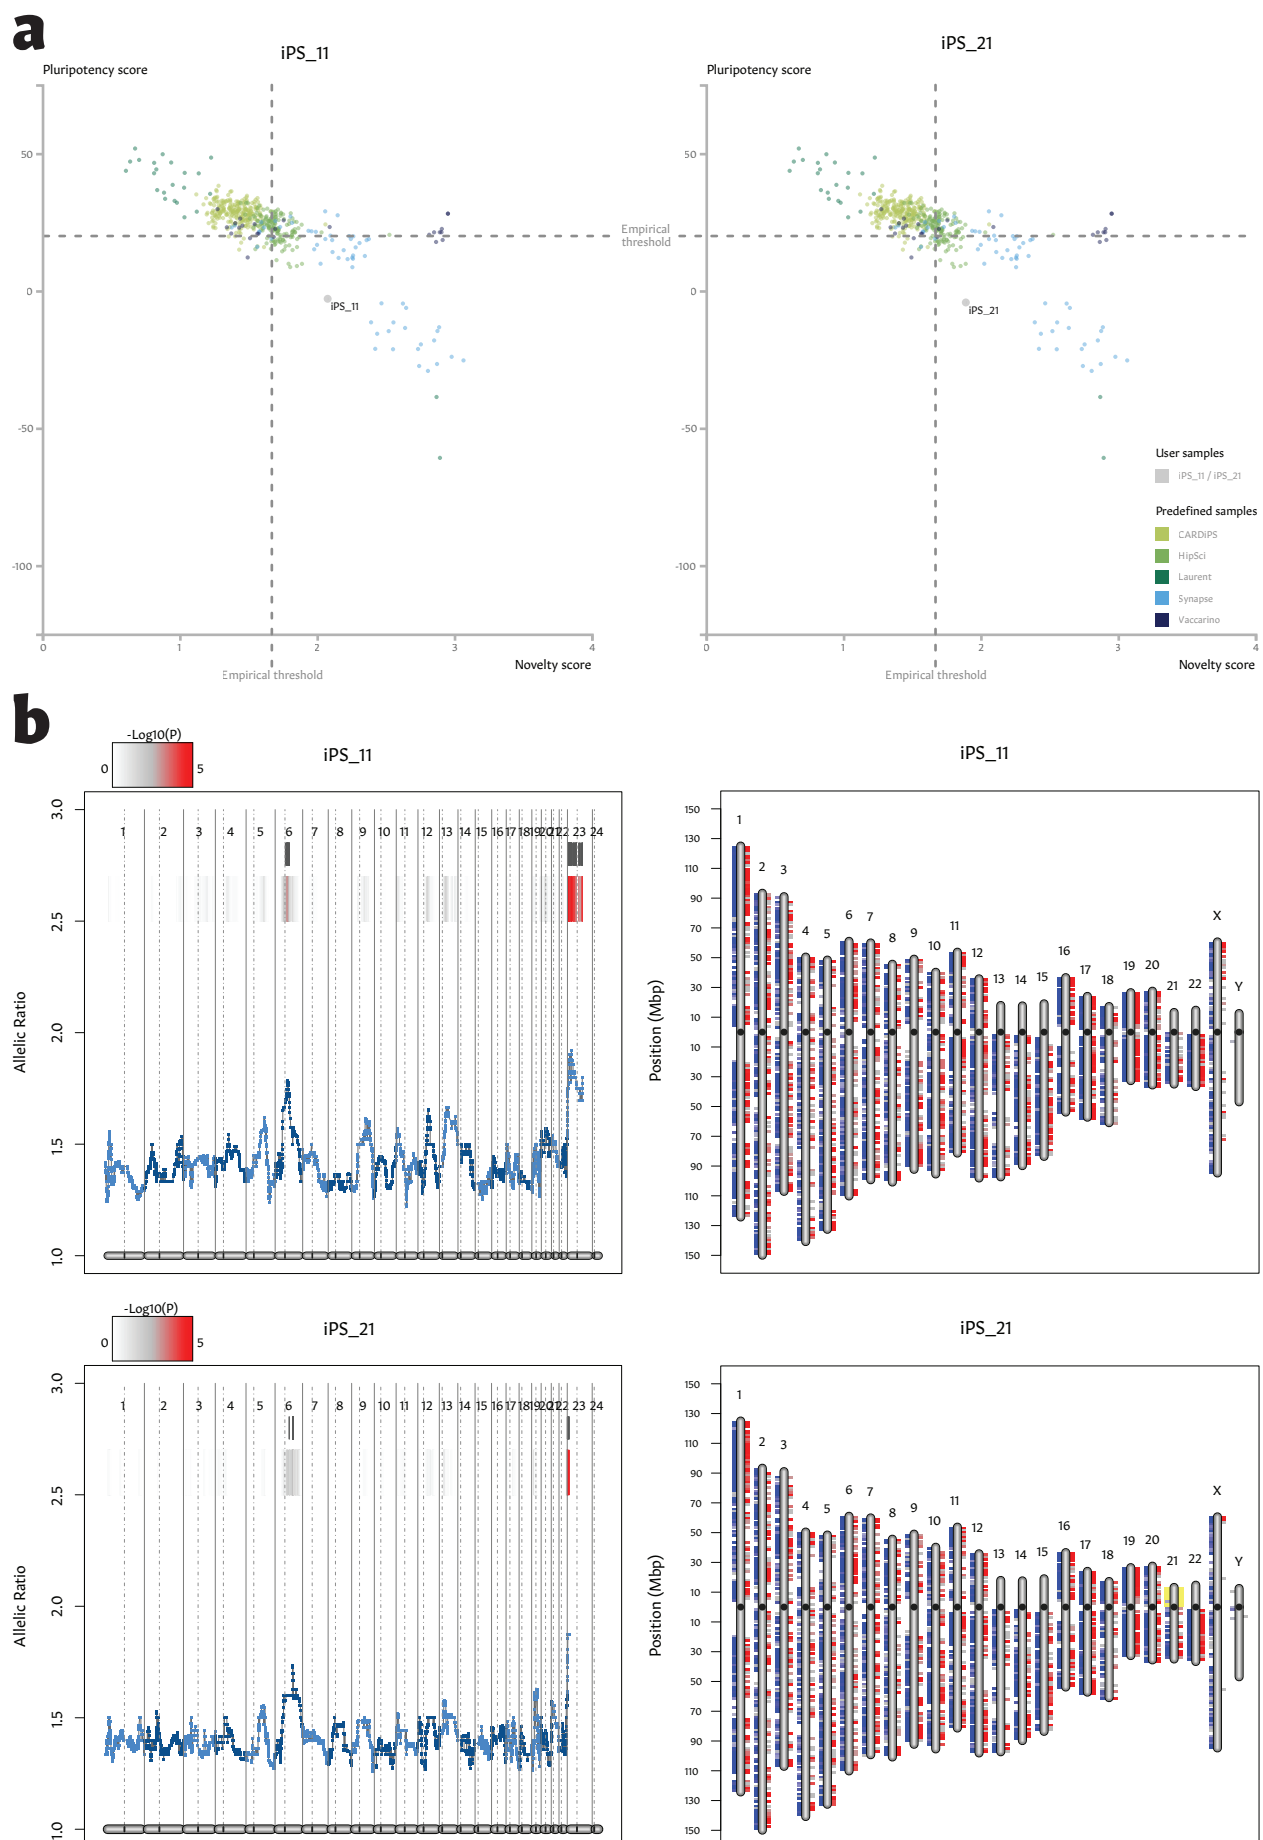

**Supplementary Figure 1. Characterization of iPS11 and iPS21 Pluripotency.** (a) Pluripotency/Novelty score of iPSC of the two cell lines used in the study from Pluritest using RNA-Seq data. (b) Moving average plots and per-chromosome recombination maps of the two cell lines used in the study, showing the absence of chromosome aneuploidy in the cell lines used. Color bars represent the  $-\log_{10}$  value FDR-calibrated P. In addition, no loss of heterozygosity was detected.
